# Supplementary material
Source: PubMed Central journal article supplement (PMC33183)
Supplement: pnas_081510898_6.pdf [file pnas_081510898_6.pdf]

**Table 1. Quantitative analysis of cell infiltration and mucus production in lungs from mice treated with sense or antisense gob-5 construct**

| Treatment*  |       | Total cells <sup>†</sup> ,<br>cells/mm <sup>2</sup> | Eosinophils <sup>†</sup> ,<br>cells/mm <sup>2</sup> | Airway epithelium <sup>‡</sup> ,<br>μm <sup>2</sup> /mm basal lamina | PAS-stained area <sup>‡</sup> ,<br>μm <sup>2</sup> /mm basal lamina |
|-------------|-------|-----------------------------------------------------|-----------------------------------------------------|----------------------------------------------------------------------|---------------------------------------------------------------------|
| Ad-wt       | Day 3 | 3,959 ± 683                                         | 303 ± 89                                            | 6,210 ± 268                                                          | 147 ± 67                                                            |
| Ad-gob-5-S  | Day 3 | 6,633 ± 537**                                       | 1,600 ± 154***                                      | 7,862 ± 411***                                                       | 2,387 ± 438***                                                      |
| Ad-wt       | Day 6 | 7,927 ± 385                                         | 2,051 ± 129                                         | 13,048 ± 987                                                         | 3,926 ± 611                                                         |
| Ad-gob-5-AS | Day 6 | 7,057 ± 257                                         | 1,385 ± 203**                                       | 9,996 ± 396**                                                        | 893 ± 208***                                                        |

Significant differences from control adenovirus-treated mice; \*\*,  $P < 0.05$ ; \*\*\*,  $P < 0.01$ .

\*OVA-sensitized mice were administered either adenovirus-expressing sense gob-5 (Ad-gob-5-S) or adenovirus expressing antisense gob-5 (Ad-gob-5-AS), or control adenovirus (Ad-wt) as described in *Materials and Methods*.

<sup>†</sup>Total infiltrated cells and eosinophils around pulmonary blood vessels and bronchi were enumerated as described in *Materials and Methods*.

<sup>‡</sup>Total areas of airway epithelium and PAS-stained area of epithelium were measured by computerized image analysis system as described in *Materials and Methods*.
