# Supplementary material
Source: PubMed Central journal article supplement (PMC33183)
Supplement: pnas_081510898_7.pdf [file pnas_081510898_7.pdf]

**Table 2. Quantitative analysis of MAC5AC expression in whole lungs from mice treated with sense or antisense gob-5**

| Treatment   |       | MAC5AC mRNA expression,<br>copies $\times 10^{-4}$ /GAPDH copies |
|-------------|-------|------------------------------------------------------------------|
| Ad-wt       | Day 3 | 105 $\pm$ 18                                                     |
| Ad-gob-5-S  | Day 3 | 210 $\pm$ 26**                                                   |
| Ad-wt       | Day 6 | 308 $\pm$ 114                                                    |
| Ad-gob-5-AS | Day 6 | 199 $\pm$ 25                                                     |

Total RNA from adenovirus-administered lung tissues was reverse-transcribed using TaqMan Gold RT-PCR Kit (Applied Biosystems). Complementary DNA corresponding to 25 ng of total RNA was measured by real-time quantitative PCR using Applied Biosystems Prism 7700, Sequence Detection System. Matching primers (Forward primer; 5'-GCACGAAAACAGAGACCAACTG-3', Reverse primer; 5'-TGTCTATGGT TGCTGAGTGACTACTG-3') and TaqMan probe (5'-CCCATGTGTATTCCTCTCCC ACAAAGACA-3') were designed according to the PRIMER EXPRESS program provided by Applied Biosystems. GAPDH gene expression was quantified using TaqMan GAPDH Control Reagents (Applied Biosystems). A standard curve for individual amplicon was generated by using the DNA fragment by standard PCR protocols as described in *Materials and Methods*. Significant differences from control adenovirus-treated mice; \*\*,  $P < 0.01$ .
